# Supplementary material
Source: publisher figshare collection journal article supplement (https://acs.figshare.com/ndownloader/files/12379076)

# **Supporting Information**

## **Pressure-Induced Conformer Modifications and Electronic Structural Changes in 1, 3, 5-triamino-2, 4, 6-trinitrobenzene (TATB) Upto 20 GPa**

Xiaoyu Sun<sup>1†</sup>, Xiangqi Wang<sup>1†</sup>, Wentao Liang<sup>1</sup>, Chan Gao<sup>1</sup>, Zhilei Sui<sup>1</sup>, Moxiao Liu<sup>2</sup>,

Rucheng Dai<sup>3</sup>, Zhongping Wang<sup>3\*</sup>, Xianxu Zheng<sup>4</sup>, and Zengming Zhang<sup>3,5\*</sup>

<sup>1</sup>Department of Physics, University of Science and Technology of China, Hefei,

Anhui 230026, China

<sup>2</sup>College of Computer Science and Technology, Chongqing University of Posts and

Telecommunications, Chongqing 40065, China

<sup>3</sup>The Centre for Physical Experiments, University of Science and Technology of

China, Hefei, Anhui 230026, China

<sup>4</sup>Institute of Fluid Physics, China Academy of Engineering Physics, Mianyang,

Sichuan 621900, China

<sup>5</sup>Key Laboratory of Strongly-Coupled Quantum Matter Physics, Chinese Academy of

Sciences, School of Physical Sciences, University of Science and Technology of

China, Hefei, Anhui 230026, China

†Co-authors: xysun2015@mail.ustc.edu.cn and wxq@mail.ustc.edu.cn

\*Corresponding Authors: (Z,Z) zzm@ustc.edu.cn and (Z,W) zpwang@ustc.edu.cn

Figure S1. Energy-band diagram of TATB crystal structure at ambient condition

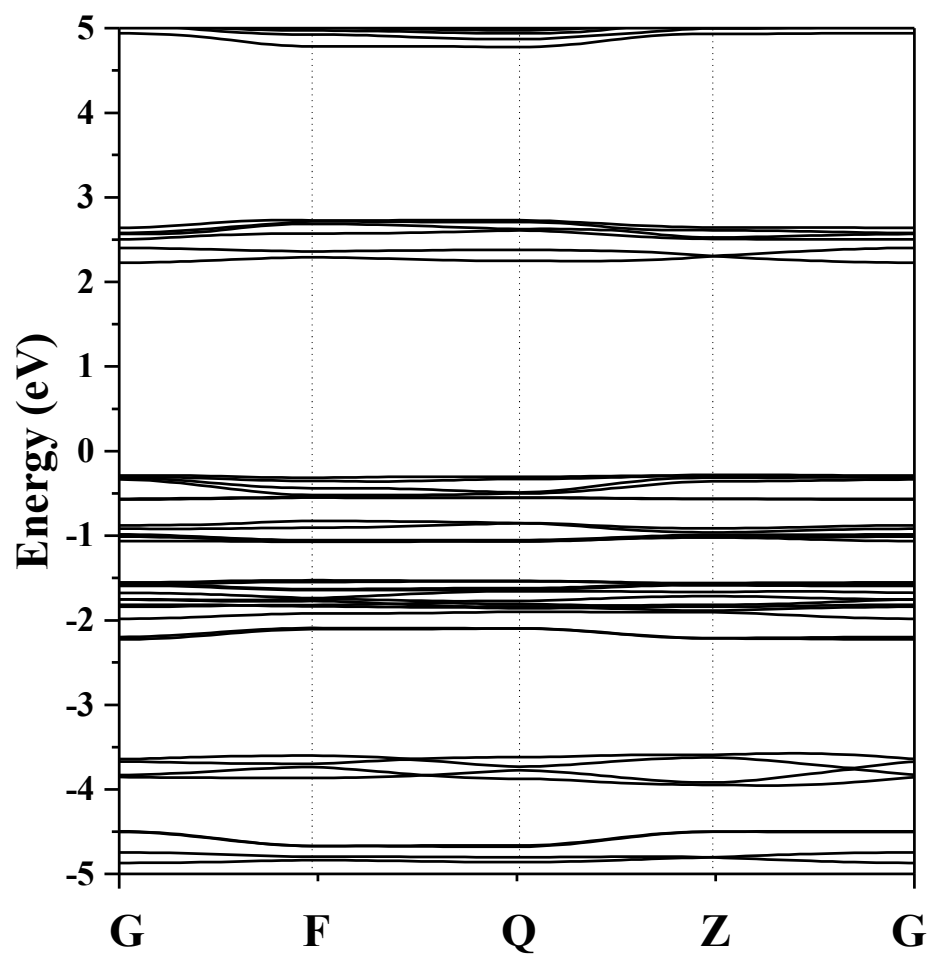

Figure S2. The comparison between experimental and theoretical lattice parameters under compression in this work

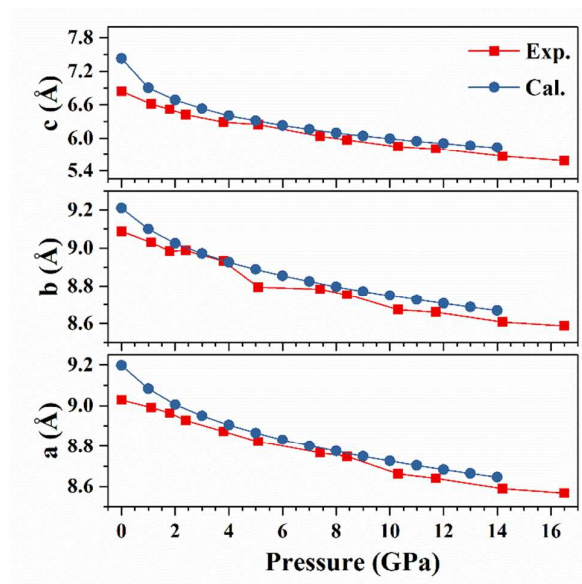

Figure S3. The comparison between theoretical and experimental equation of state in this work

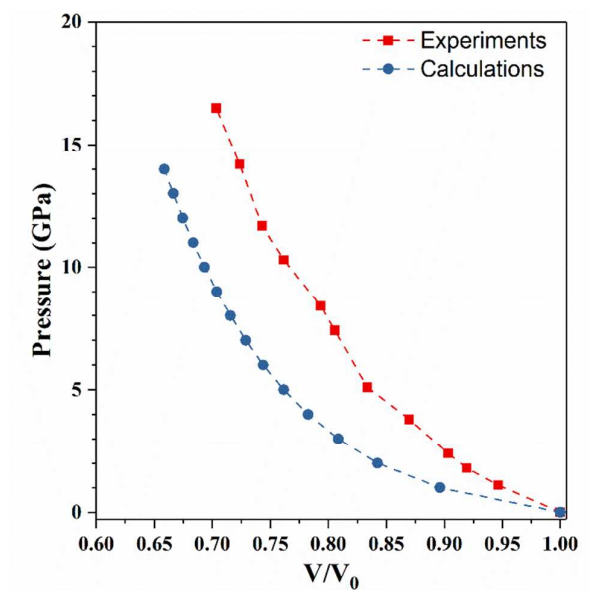

Supplement: Supplementary file 1 [file 12379076]
